# Supplementary material
Source: PubMed Central journal article supplement (PMC10111596)

## **SUPPLEMENTAL MATERIALS**

Cross-cultural adaptation and initial validation of Mi Niño, a tool to measure food-related parenting practices of Spanish-speaking parents with young children.

L. Karina Díaz Rios

**SUPPLEMENTAL FIGURE.** Response frequency ( $n = 243$ ) of Mi Niño items that correspond to (A) parent-centered strategies and (B) child-centered strategies.

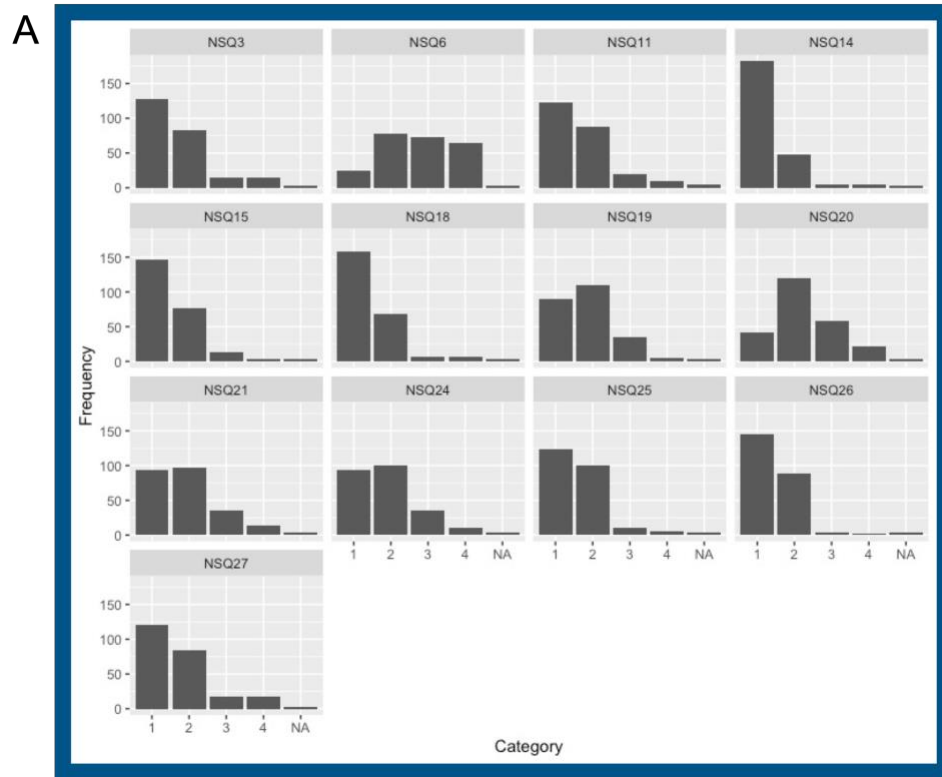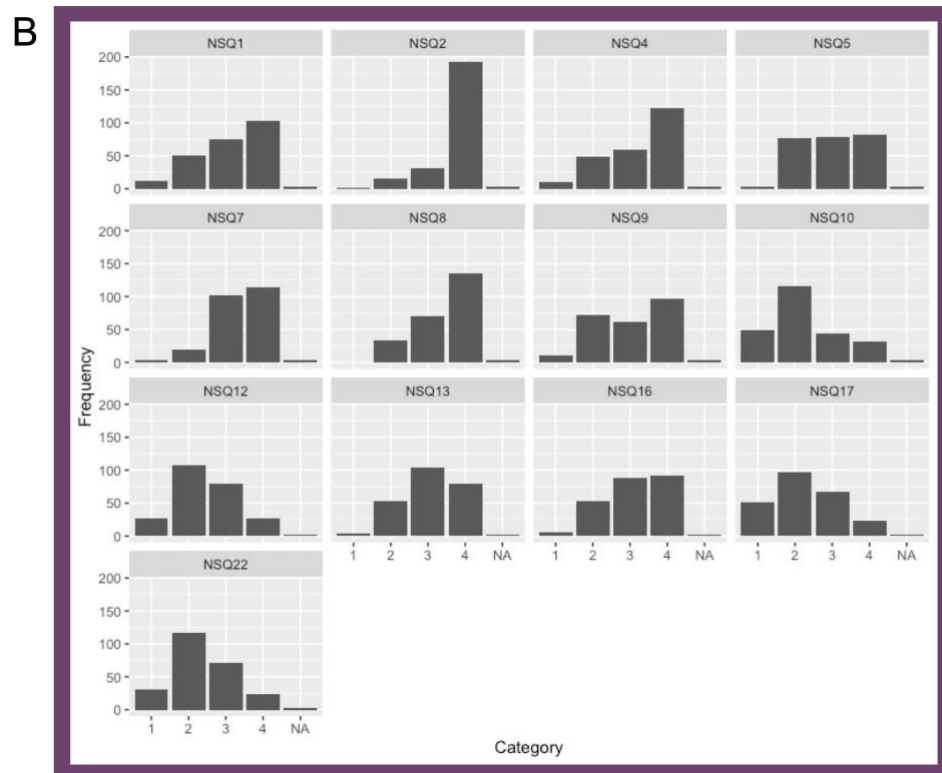

Supplement: mmc1.pdf [file mmc1.pdf]
